# Supplementary material
Source: PubMed Central journal article supplement (PMC7720932)
Supplement: NIHMS1597714-supplement-1.pdf [file NIHMS1597714-supplement-1.pdf]

| <b>Supplementary Table 1. Bivariate Correlations for the 13 Items of Contributory Factors</b> |             |             |        |             |             |             |             |        |             |         |         |             |         |
|-----------------------------------------------------------------------------------------------|-------------|-------------|--------|-------------|-------------|-------------|-------------|--------|-------------|---------|---------|-------------|---------|
|                                                                                               | Item 1      | Item 2      | Item 3 | Item 4      | Item 5      | Item 6      | Item 7      | Item 8 | Item 9      | Item 10 | Item 11 | Item 12     | Item 13 |
| Item 1. Patient was not given the information needed to make an informed decision             | 1           |             |        |             |             |             |             |        |             |         |         |             |         |
| Item 2. Health care personnel did not listen to patient or family                             | 0.41        | 1           |        |             |             |             |             |        |             |         |         |             |         |
| Item 3. Patient was not properly monitored                                                    | 0.28        | 0.49        | 1      |             |             |             |             |        |             |         |         |             |         |
| Item 4. Nurse did not respond quickly to the call button                                      | 0.21        | 0.29        | 0.39   | 1           |             |             |             |        |             |         |         |             |         |
| Item 5. Doctor was slow to arrive                                                             | 0.24        | 0.39        | 0.49   | <b>0.52</b> | 1           |             |             |        |             |         |         |             |         |
| Item 6. Health care personnel did not communicate well with each other                        | 0.29        | <b>0.50</b> | 0.50   | 0.45        | <b>0.52</b> | 1           |             |        |             |         |         |             |         |
| Item 7. Health care personnel seemed untrained or lacking in knowledge                        | 0.26        | 0.44        | 0.40   | 0.37        | 0.37        | 0.49        | 1           |        |             |         |         |             |         |
| Item 8. Health care personnel seemed over-confident                                           | 0.30        | 0.48        | 0.355  | 0.20        | 0.28        | 0.37        | 0.46        | 1      |             |         |         |             |         |
| Item 9. Health care personnel seemed overtired or fatigued                                    | 0.12        | 0.20        | 0.20   | 0.32        | 0.30        | 0.27        | 0.33        | 0.28   | 1           |         |         |             |         |
| Item 10. Health care personnel seemed overworked, rushed, or behind schedule                  | 0.13        | 0.27        | 0.30   | 0.29        | 0.34        | 0.32        | 0.36        | 0.35   | <b>0.62</b> | 1       |         |             |         |
| Item 11. Health care personnel did not communicate important information to patient           | <b>0.61</b> | 0.43        | 0.41   | 0.29        | 0.34        | 0.48        | 0.33        | 0.32   | 0.17        | 0.26    | 1       |             |         |
| Item 12. Health care personnel did seem familiar with the patient's case                      | 0.30        | 0.49        | 0.38   | 0.28        | 0.42        | <b>0.50</b> | <b>0.53</b> | 0.41   | 0.31        | 0.34    | 0.41    | 1           |         |
| Item 13. Health care personnel did not seem concerned about the patient                       | 0.38        | <b>0.61</b> | 0.46   | 0.30        | 0.39        | <b>0.51</b> | <b>0.51</b> | 0.49   | 0.20        | 0.37    | 0.49    | <b>0.51</b> | 1       |
